# Supplementary material for: Temporally and spatially controlled silicification for self-generating polymer@silica hybrid nanotube on substrates with tunable film nanostructure
Source: Royal Society of Chemistry journal article supplement (doi:10.1039/c2jm15993g), 2012-01-01
Supplement: c2jm15993g.pdf [file c2jm15993g.pdf]

**Electronic Supplementary Information for**

**Temporally and spatially controlled silicification for self-generating  
polymer@silica hybrid nanotube on substrates  
with tunable film nanostructure**

***Jian-Jun Yuan,<sup>a</sup> and Ren-Hua Jin<sup>a,b\*</sup>***

*<sup>a</sup>Synthetic Chemistry Lab., Kawamura Institute of Chemical Research,  
631 Sakado, Sakura, 285-0078 Japan, <sup>b</sup>CREST-JST*

Correspondence and requests for materials should be addressed to R.H.J.

Tel:+81-43-498-4104, Fax:+81-43-498-2202

\*email: [jin@kicr.or.jp](mailto:jin@kicr.or.jp)

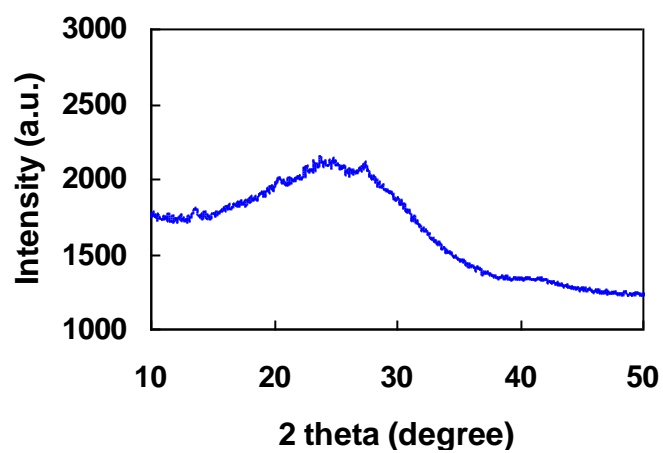

**Fig. S1** Thin film XRD profile for crystalline LPEI layer formed by aqueous, room-temperature and alkali-induced process.

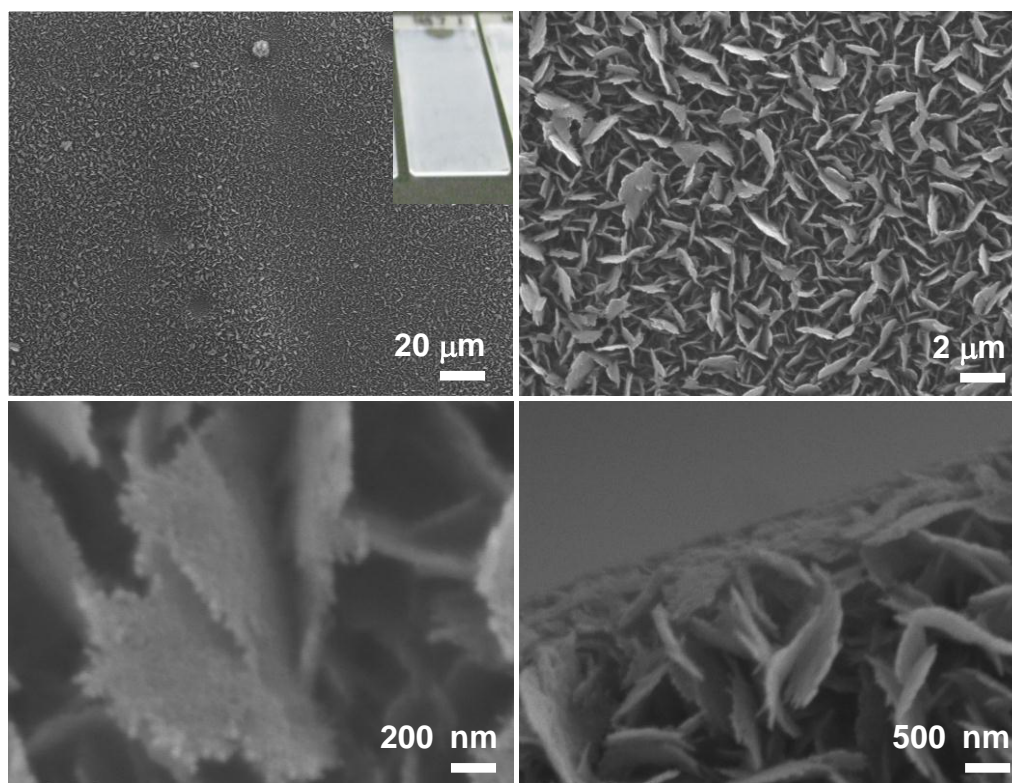

**Fig. S2** SEM images of LPEI@silica nanotube film on a flat glass slide. The LPEI self-assembly was conducted in 0.1 M NaOH solution, and the other synthesis conditions are identical to that used in Fig. 1.

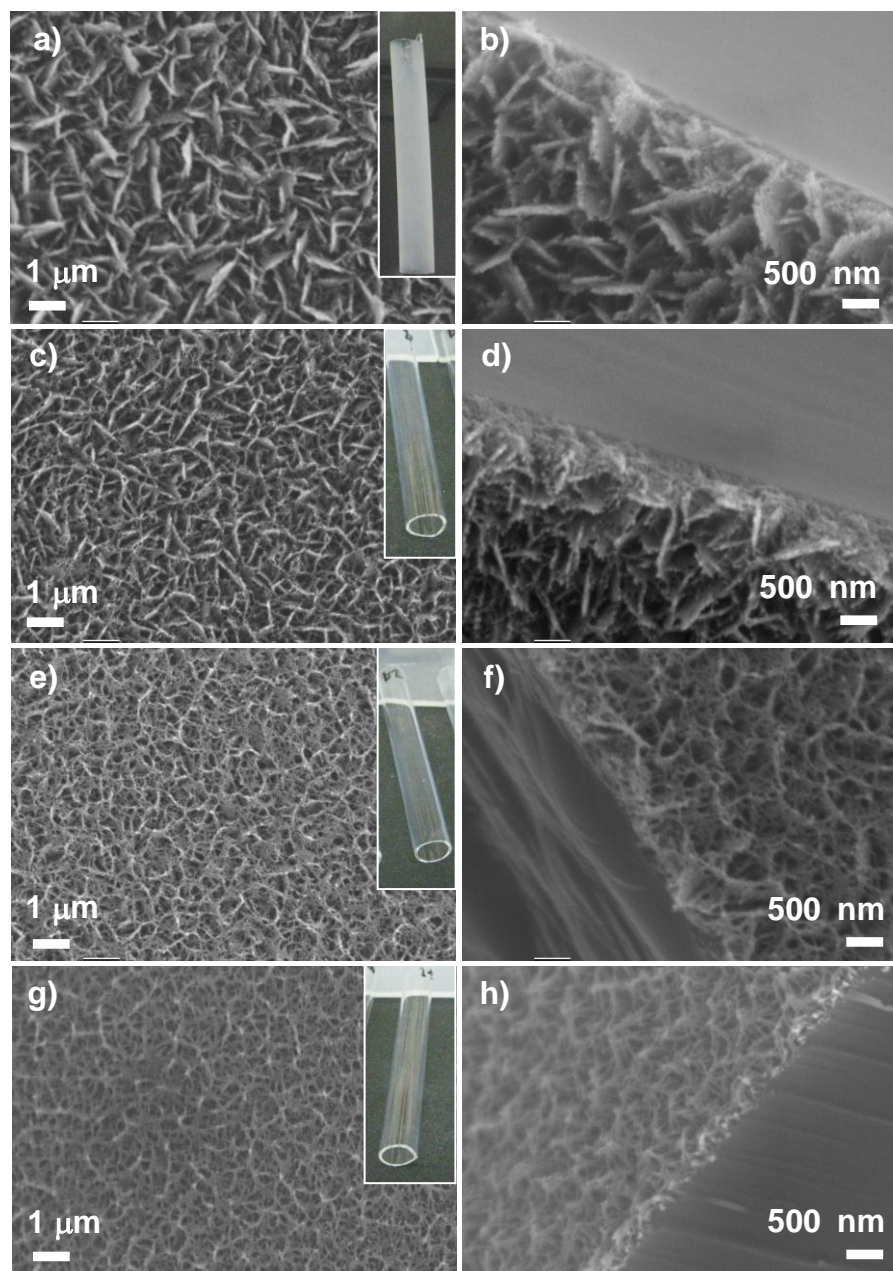

**Fig. S3** SEM images of LPEI@silica nanotube film prepared by using ammonia solutions for LPEI self-assembly with the concentrations of 0.5 M (a-b), 0.05 M (c-d), 0.01 M (e-f) and 0.001 M (g-h). Other synthesis conditions are identical to that used in Fig.1.

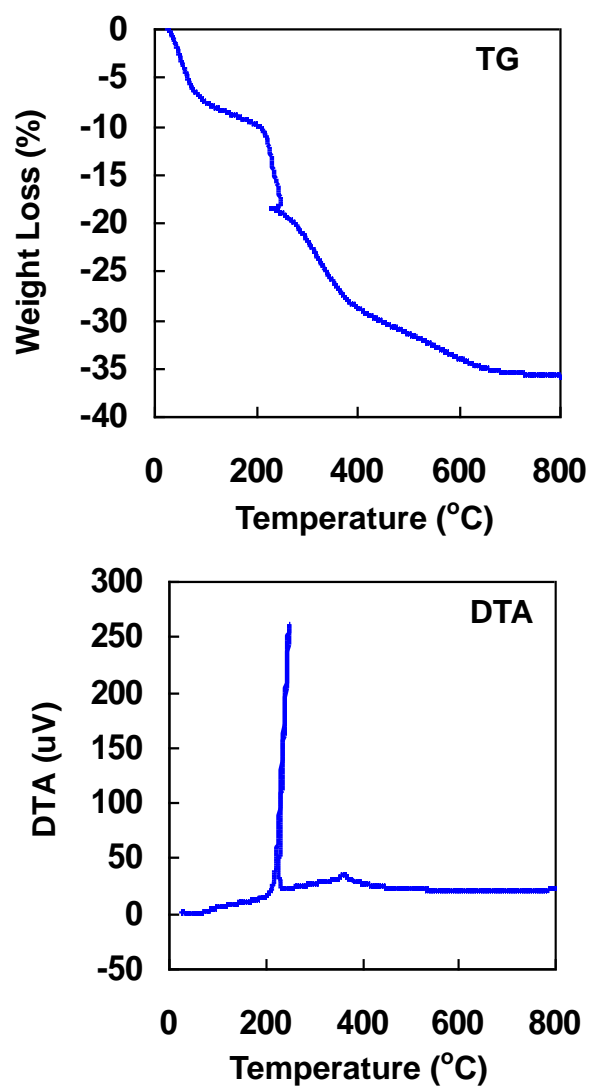

**Fig. S4** TG and DTA curves for hybrid LPEI@silica nanotube shown in Fig. 7.
